# Supplementary material for: Surface characteristics influencing bacterial adhesion to polymeric substrates
Source: Royal Society of Chemistry journal article supplement (doi:10.1039/c7ra01571b), 2017-01-01
Supplement: c7ra01571b1.pdf [file c7ra01571b1.pdf]

**Table S1.** Statistical comparisons of *E. coli* adhesion to different substrates using Dunn's multiple comparison test at  $\alpha = 0.05$

| Pairwise                          | No wash         |                   | After wash      |                   |
|-----------------------------------|-----------------|-------------------|-----------------|-------------------|
|                                   | Mean rank diff. | Significance test | Mean rank diff. | Significance test |
| F vs. F <sub>p</sub>              | 13.92           | Not Significant   | 32.00           | **                |
| F vs. F <sub>f</sub>              | 23.08           | Not Significant   | 12.96           | Not Significant   |
| F vs. E                           | 16.75           | Not Significant   | 15.04           | Not Significant   |
| F vs. E <sub>p</sub>              | 50.79           | ****              | 48.00           | ****              |
| F vs. E <sub>f</sub>              | 40.96           | ****              | 48.00           | ****              |
| F <sub>p</sub> vs. F <sub>f</sub> | 9.167           | Not Significant   | -19.04          | Not Significant   |
| F <sub>p</sub> vs. E              | 2.833           | Not Significant   | -16.96          | Not Significant   |
| F <sub>p</sub> vs. E <sub>p</sub> | 36.88           | ***               | 16.00           | Not Significant   |
| F <sub>p</sub> vs. E <sub>f</sub> | 27.04           | *                 | 16.00           | Not Significant   |
| F <sub>f</sub> vs. E              | -6.33           | Not Significant   | 2.08            | Not Significant   |
| F <sub>f</sub> vs. E <sub>p</sub> | 27.71           | *                 | 35.04           | ***               |
| F <sub>f</sub> vs. E <sub>f</sub> | 17.88           | Not Significant   | 35.04           | ***               |
| E vs. E <sub>p</sub>              | 34.04           | **                | 32.96           | **                |
| E vs. E <sub>f</sub>              | 24.21           | Not Significant   | 32.96           | **                |
| E <sub>p</sub> vs. E <sub>f</sub> | -9.83           | Not Significant   | 0.00            | Not Significant   |

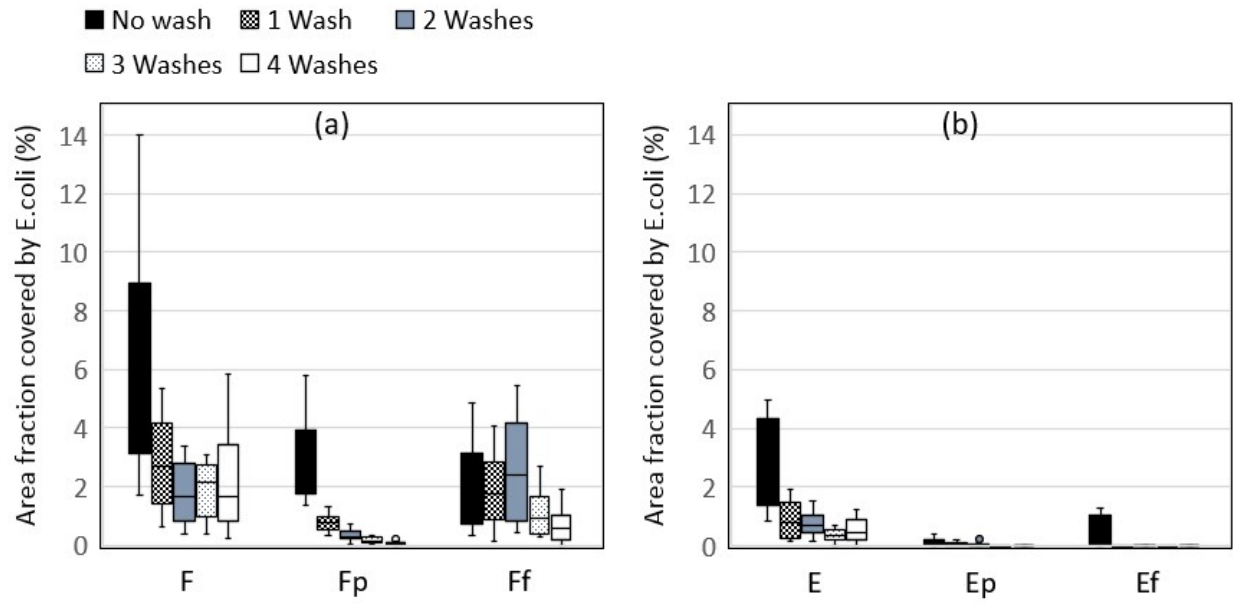

**Figure S1.** Area fraction (%) adhered by *E. coli* on PS surfaces without washing and up to four washes.
